# Supplementary material for: A Pd(AcO)2/t-Bu3P/K3PO4 catalytic system for the control of Suzuki cross-coupling polymerisation
Source: Royal Society of Chemistry journal article supplement (doi:10.1039/c4py00028e), 2014-01-01
Supplement: c4py00028e1.pdf [file c4py00028e1.pdf]

*Supplementary Information for*

**The Pd(AcO)<sub>2</sub>/*t*-Bu<sub>3</sub>P/K<sub>3</sub>PO<sub>4</sub> catalytic system for the control of  
the Suzuki cross-coupling polymerisation**

*by*

***Roberto Grisorio, Piero Mastrorilli and Gian Paolo Suranna***

*DICATECh - Dipartimento di Ingegneria Civile, Ambientale, del Territorio, Edile e di Chimica del  
Politecnico di Bari, via Orabona, 4 I-70125 Bari, Italy*

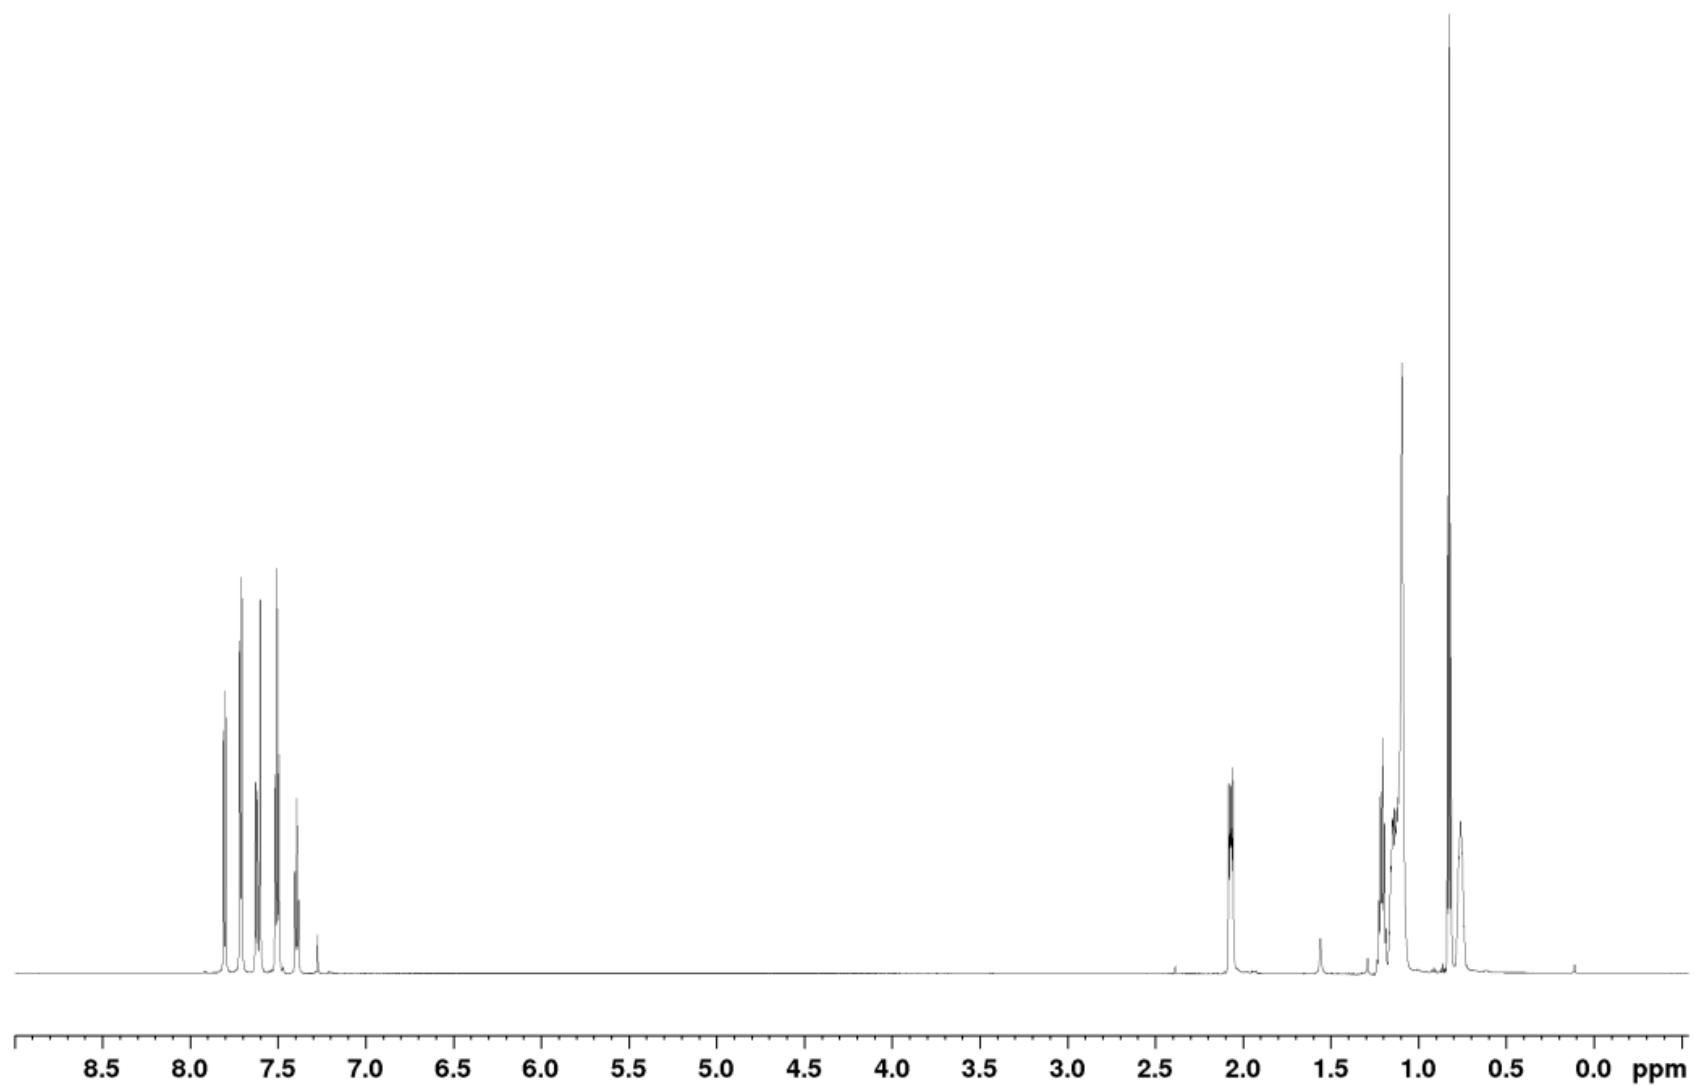

**Figure S1.** <sup>1</sup>H-NMR spectrum of 2,7-diphenyl-9,9-di-*n*-octylfluorene.

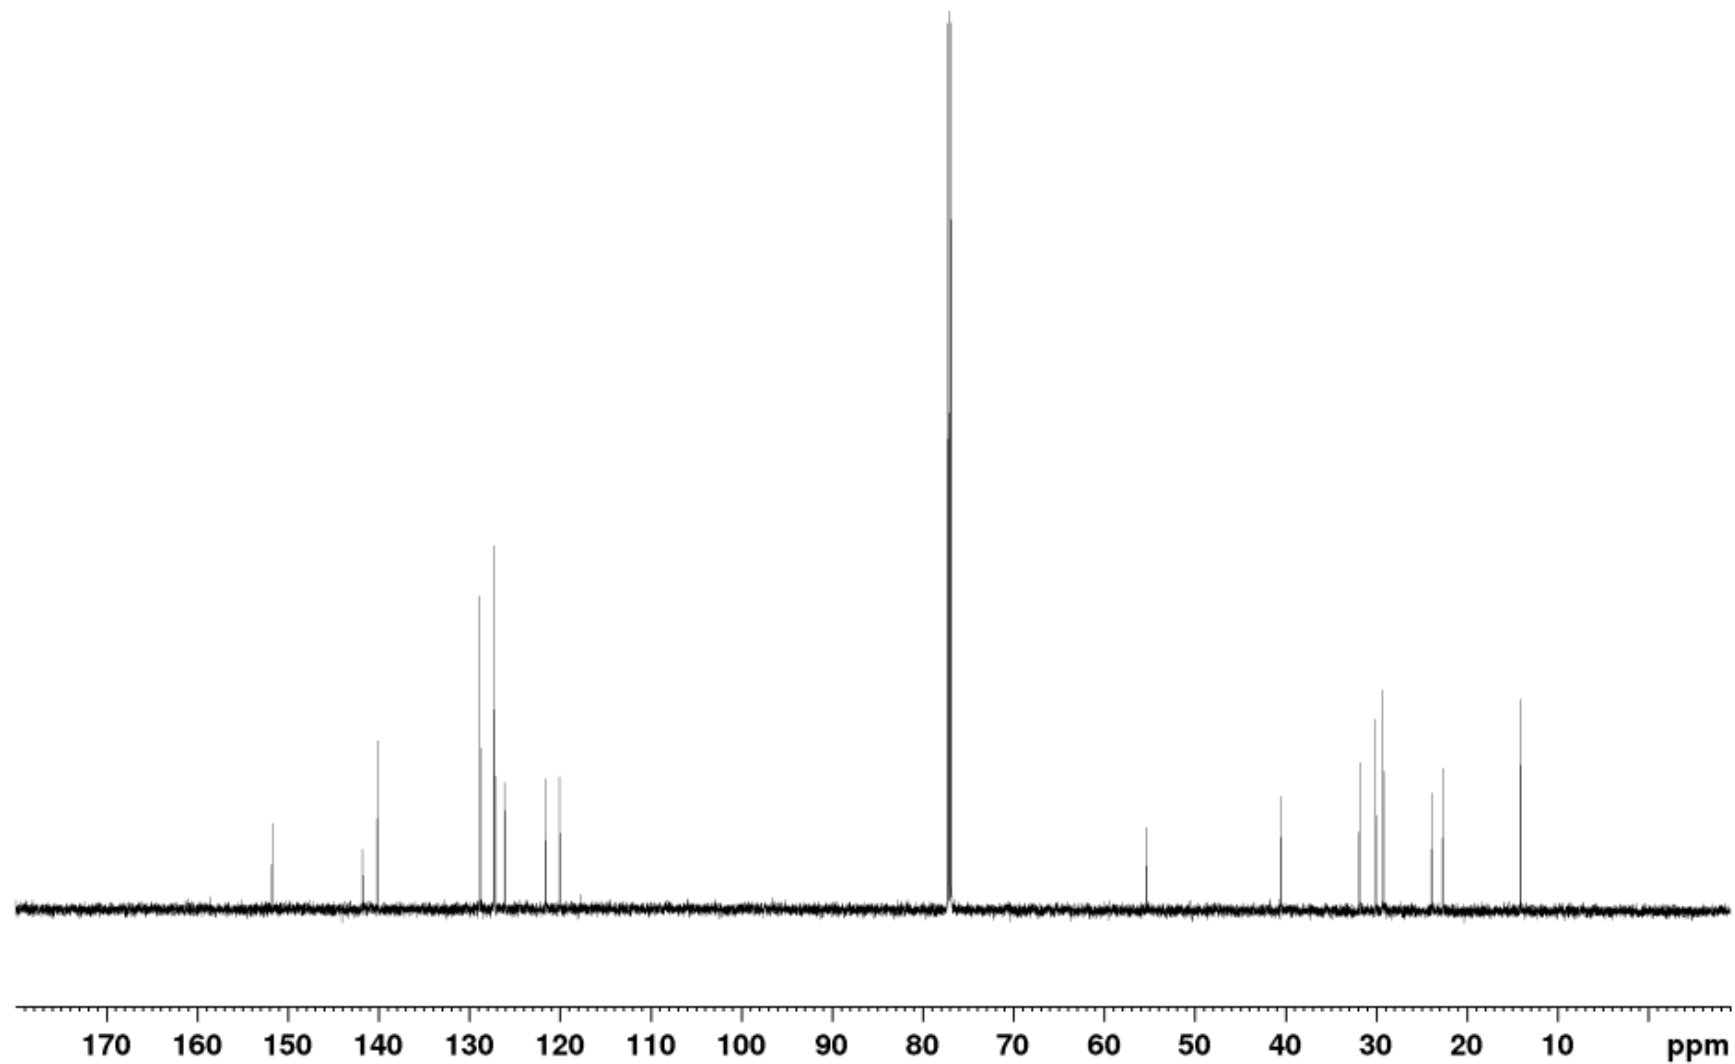

**Figure S2.**  $^{13}\text{C}\{^1\text{H}\}$ -NMR spectrum of 2,7-diphenyl-9,9-di-*n*-octylfluorene.

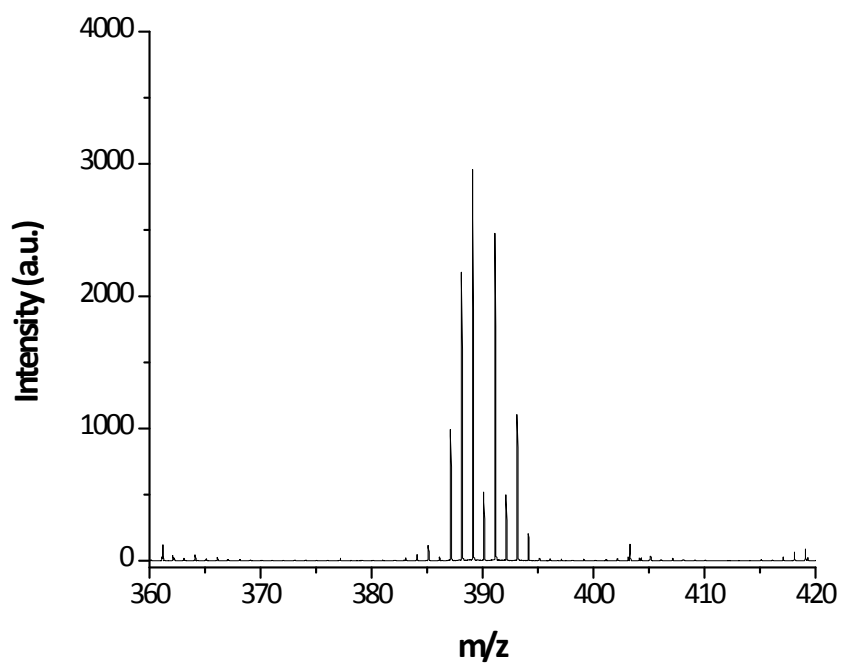

**Figure S3.** HRMS(+) spectrogram of the reaction mixture obtained according to Method A (1 equiv *t*-Bu<sub>3</sub>P) showing complex  $\beta$  as Na-adduct.

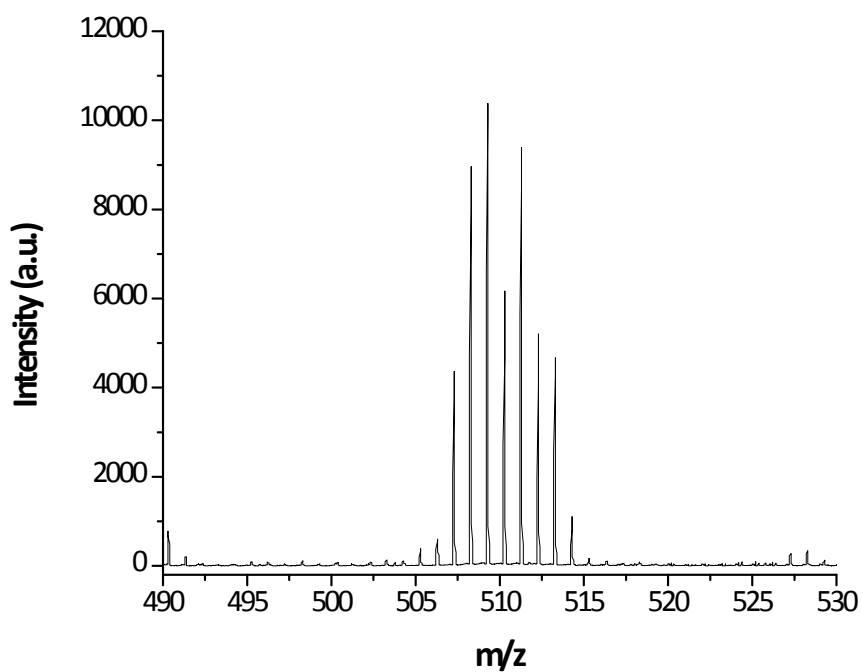

**Figure S4.** HRMS(+) spectrogram of the reaction mixture obtained according to Method A (2 equiv *t*-Bu<sub>3</sub>P) showing complex  $\delta$  as [M – AcO]<sup>+</sup>.

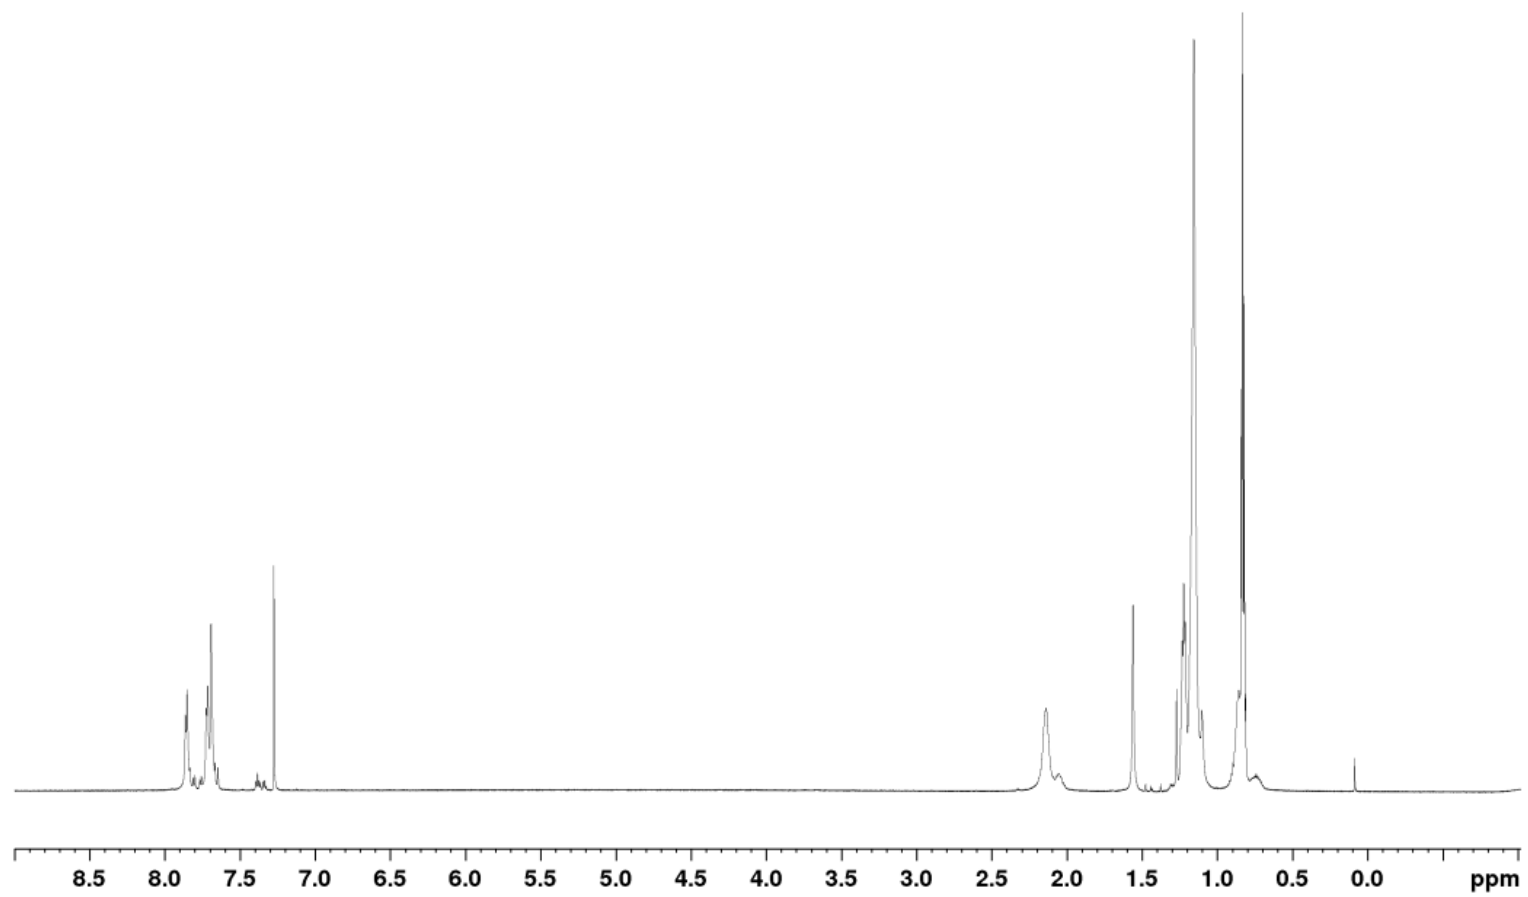

**Figure S5.** Typical  $^1\text{H}$ -NMR spectrum of the poly(9,9-di-*n*-octylfluorene)s obtained by method B.

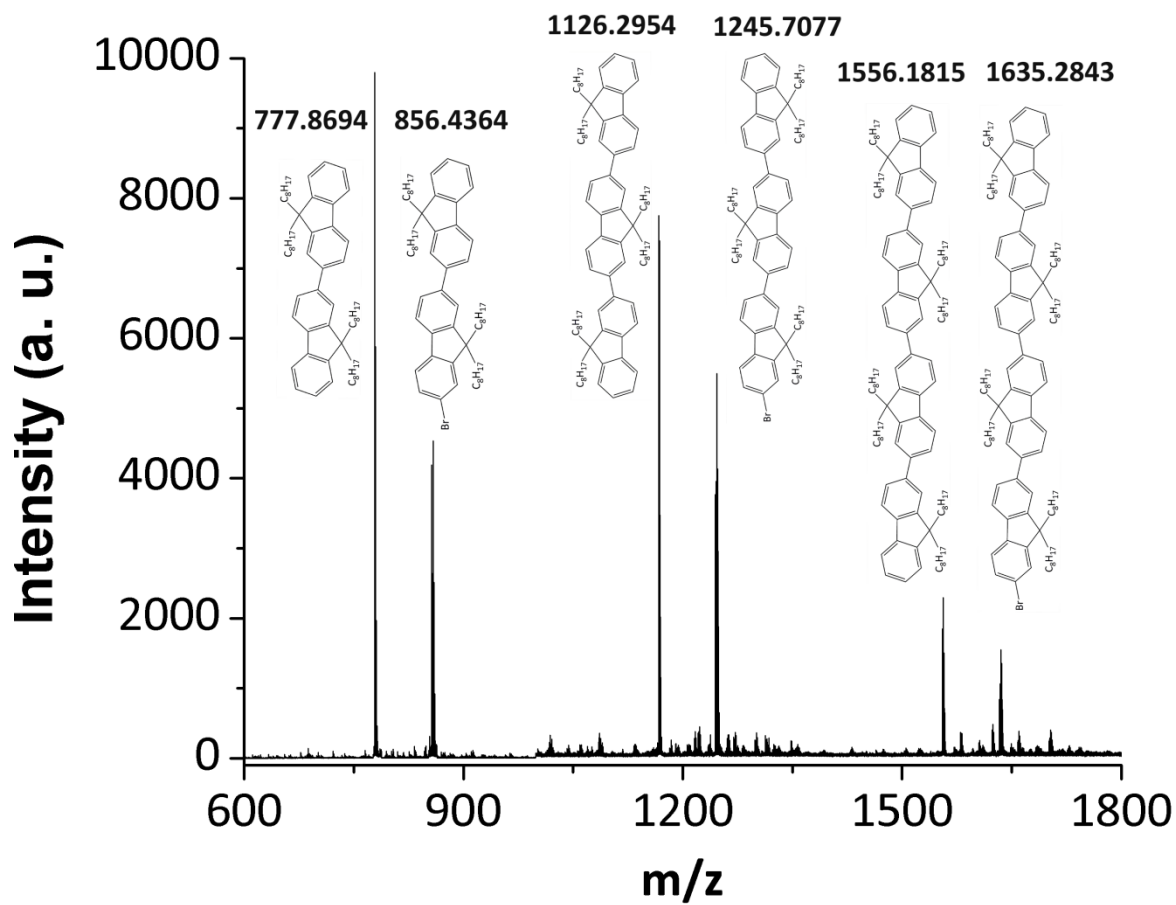

**Figure S6.** HRMS(+) spectrogram of the products obtained according to Method B with a FL/Pd(AcO)<sub>2</sub> molar ratio of 2/1.

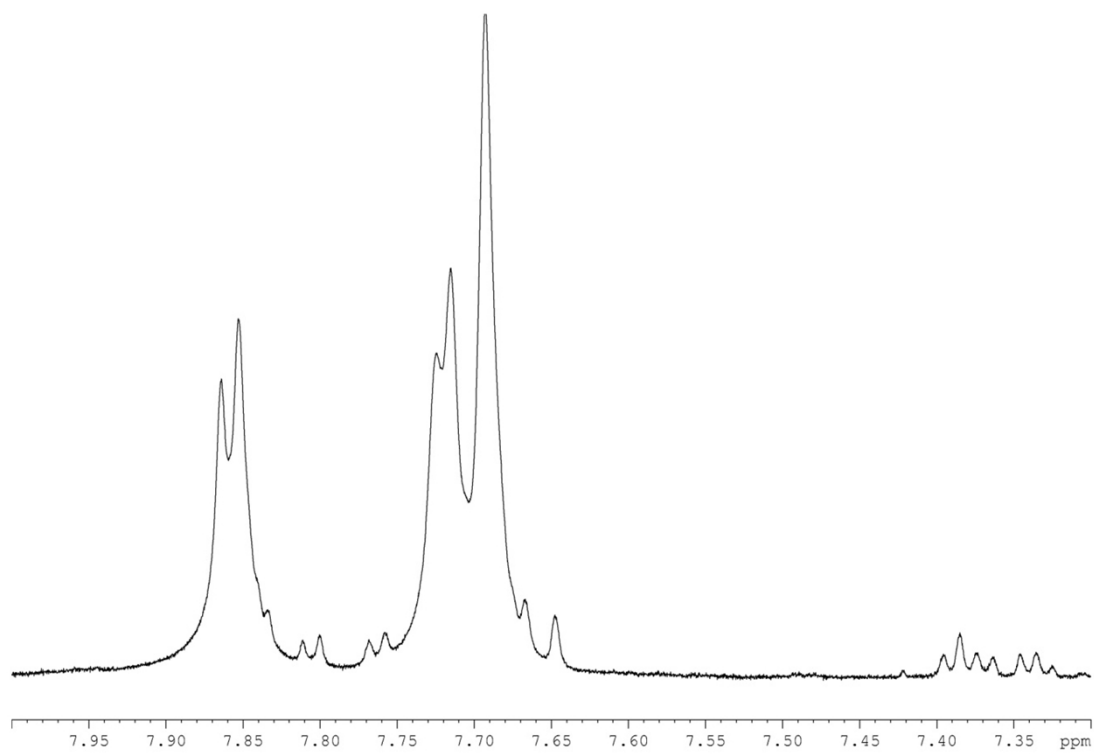

**Figure S7.** <sup>1</sup>H-NMR spectrum (aromatic region) of the polymer isolated from entry 12.

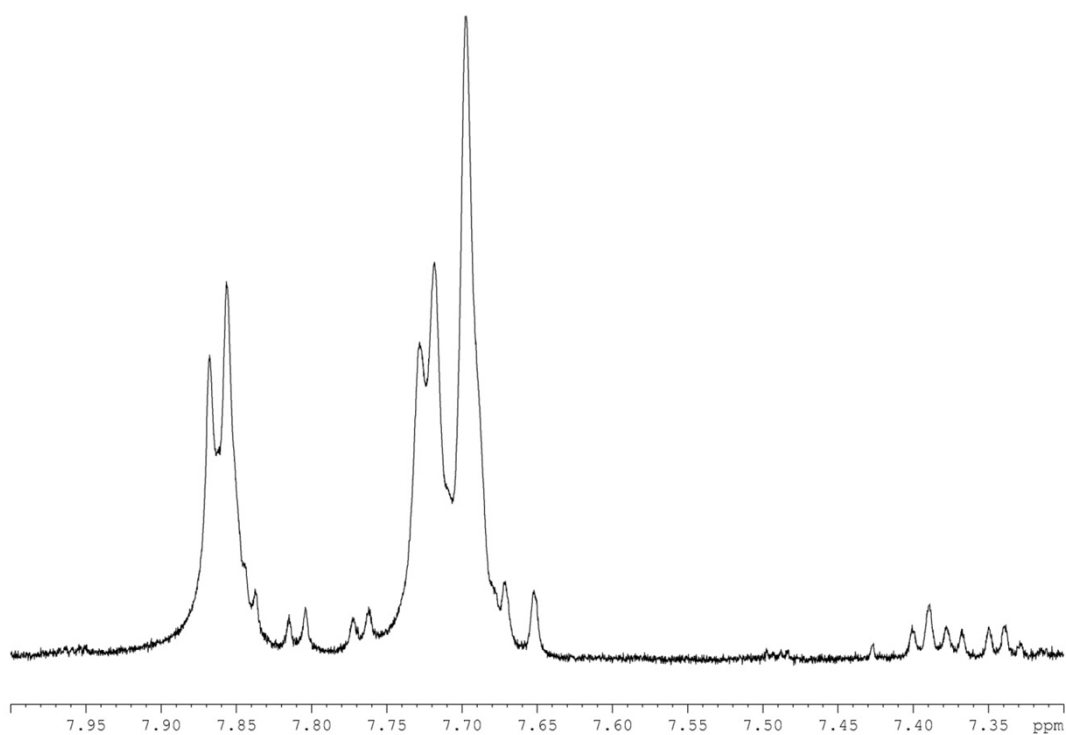

**Figure S8.**  $^1\text{H}$ -NMR spectrum (aromatic region) of the polymer isolated from entry 13.

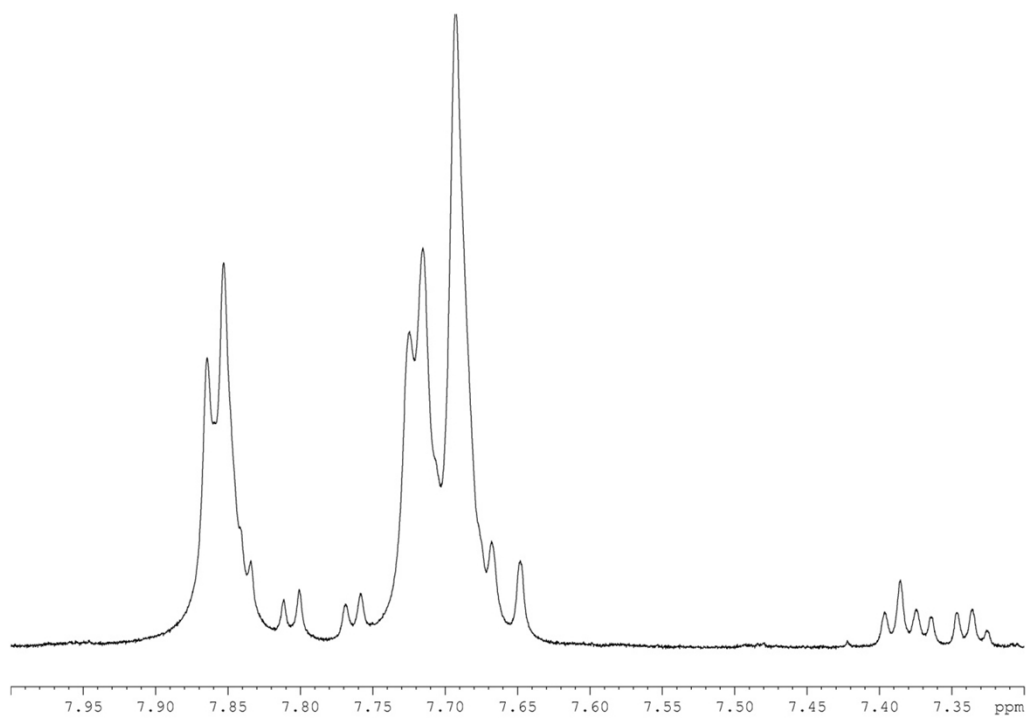

**Figure S9.**  $^1\text{H}$ -NMR spectrum (aromatic region) of the polymer isolated from entry 14.



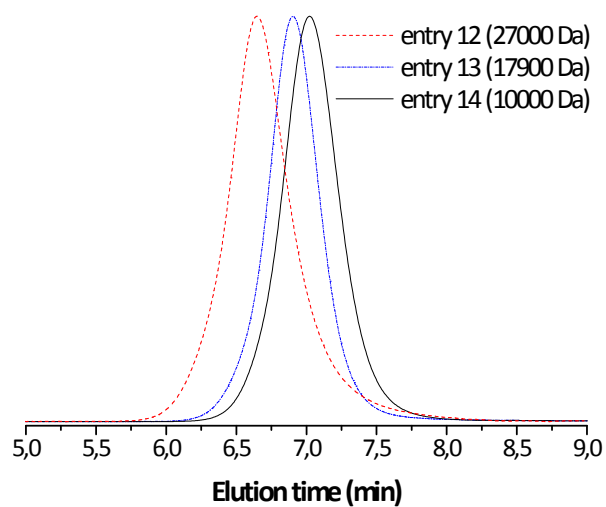

**Figure S10.** GPC traces of the isolated polymers (Table 1 of the manuscript, entries 12-14).

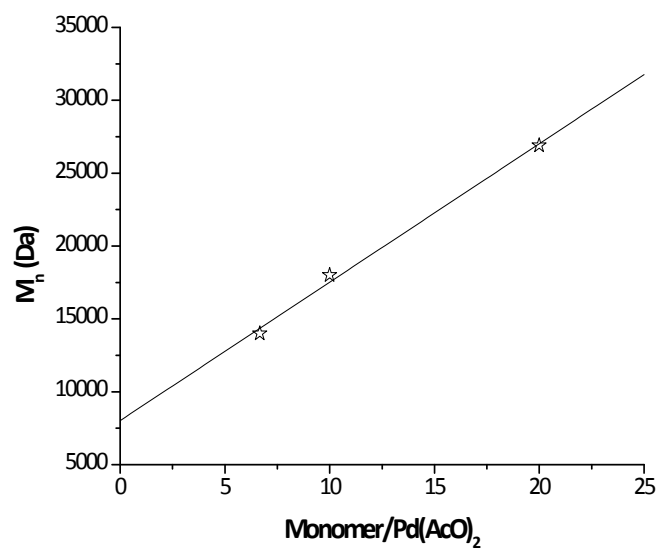

**Figure S11.** Number-average molecular weights ( $M_n$ ) vs monomer/ $\text{Pd}(\text{AcO})_2$  feed ratio of the isolated polymers (Table 1 of the manuscript, entries 12-14).
